# Supplementary material for: Shrub type dominates the vertical distribution of leaf C : N : P stoichiometry across an extensive altitudinal gradient
Source: Copernicus journal article supplement (doi:10.5194/bg-15-2033-2018), 2018-04-09
Supplement: Supplementary file 1 [file bg-15-2033-2018-supplement.zip]

Archive with 2 entries (2 files):
- bg-15-2033-2018-supplement-title-page.pdf
- Supplementary material.xlsx
