# Supplementary material for: Shrub type dominates the vertical distribution of leaf C : N : P stoichiometry across an extensive altitudinal gradient
Source: Copernicus journal article supplement (doi:10.5194/bg-15-2033-2018), 2018-04-09
Supplement: Supplementary file 1 [file bg-15-2033-2018-supplement.zip › bg-15-2033-2018-supplement-title-page.pdf]

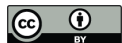

## *Supplement of*

# **Shrub type dominates the vertical distribution of leaf C : N : P stoichiometry across an extensive altitudinal gradient**

**Wenqiang Zhao et al.**

*Correspondence to:* Qing Liu ([liuqing@cib.ac.cn](mailto:liuqing@cib.ac.cn)) and Huajun Yin ([yinhj@cib.ac.cn](mailto:yinhj@cib.ac.cn))

- [bg-15-2033-2018-supplement-title-page.pdf](#)
- [Supplementary material.xlsx](#)

The copyright of individual parts of the supplement might differ from the CC BY 4.0 License.
