# Supplementary material for: Shrub type dominates the vertical distribution of leaf C : N : P stoichiometry across an extensive altitudinal gradient
Source: Copernicus journal article supplement (doi:10.5194/bg-15-2033-2018), 2018-04-09
Supplement: Supplementary file 1 [file Supplementary material.xlsx]

## Sheet: Raw data
Environmental variables, leaf element, and soil element contents of 125 shrub sample sites on the Tibetan Plateau, China. MAP (mm), mean annual precipitation; MAT (°C), mean annual temperature; RDI, Reconnaissance Drought Index; C (mg g−1), carbon; N (mg g−1), nitrogen; P (mg g−1), phosphorus. The leaf element concentrations are presented in units of mg g−1 dry weight, and the element ratios are …
Number	Sample year	Altitude (m)	Longitude (°)	Latitude (°)	MAP	MAT	RDI	Leaf C	Leaf N	Leaf P	Soil C	Soil N	Soil P	Altitudinal type	Functional type	Species
1	2011	523	105.913	32.4228	1277.17	14.6146	0.382803	462.867	16.6667	0.823333	52.11	3.06333	0.52	3	3	Vitex negundo Linn.
2	2013	539	105.76	28.0553	875.425	12.7899	0.0497616	479.833	21.2	2.64	9.85	1.18333	0.496667	3	3	Vitex negundo Linn.
3	2011	540	106.265	32.295	1435.72	15.3069	0.426029	433.567	17.3	0.846667	43.6267	2.17333	0.803333	3	3	Coriaria sinica Maxim.
4	2011	574	107.766	31.3346	1543.91	16.9707	-0.741797	454.25	13.625	1.295	10.855	1.125	0.415	3	3	Vitex negundo Linn.
5	2011	600	106.265	32.2957	1435.72	15.3069	0.426029	444.5	13.675	0.6875	60.79	2.35	0.6125	4	3	Cotinus coggygria Scop.
6	2011	612	105.265	32.3457	1009.99	16.2091	-0.407194	435.867	15.1667	1.58	4.20333	0.943333	0.476667	3	3	Vitex negundo Linn.
7	2011	627	107.787	31.3255	1543.91	16.9707	-0.741797	455.025	11.95	1.3775	8.94	0.9975	0.2925	3	1	Pyracantha fortuneana (Maxim.) Li
8	2012	716	104.824	31.9114	740.95	16.0628	-0.847803	463.2	16.2	1.22	29.99	1.35	0.62	3	3	Vitex negundo Linn.
9	2012	725	104.821	32.2683	726.79	12.4982	-0.649826	459.8	13.3	0.88	25.12	2.61	1.11	3	3	Vitex negundo Linn.
10	2012	728	104.827	32.2264	726.79	12.4982	-0.649826	422.5	15.7	1.14	11.76	1.13	0.86	3	3	Coriaria sinica Maxim.
11	2012	746	104.121	31.3934	906.272	16.7013	-0.213159	457.2	25.9	2.52	13	1.28	0.4	3	3	Rhus chinensis Mill.
12	2011	777	107.795	31.3148	1543.91	16.9707	-0.741797	452.167	21.3	1.16333	13.6067	1.365	0.275	3	3	Quercus fabri Hance
13	2011	823	107.181	31.9685	1514.23	15.149	-0.549056	440.55	15.475	1.0775	14.5525	1.4275	0.225	3	1	Pyracantha fortuneana (Maxim.) Li
14	2011	856	104.987	32.5329	875.425	12.7899	-0.0560354	459.8	20.2333	0.973333	4.82	0.876667	0.773333	3	3	Spiraea sericea Turcz.
15	2011	930	107.81	31.3004	1555.43	16.8343	-0.69788	430.925	13.35	0.7275	22.85	1.475	0.24	3	1	Loropetalum chinense (R. Br.) Oliver
16	2012	942	103.667	32.7335	373.51	11.0909	0.737822	467.6	19.4	1.29	57.77	6.13	0.74	4	3	Spiraea chinensis Maxim.
17	2011	1020	104.99	32.5354	875.425	12.7899	-0.0560354	432.6	20.3667	1.14	3.53	0.76	0.883333	3	3	Coriaria sinica Maxim.
18	2011	1043	106.464	32.6118	1466.3	7.33341	1.1121	465.95	18	0.9975	53.6	3.37	0.39	3	3	Quercus variabilis Blume
19	2012	1050	101.844	26.6892	1435.72	15.3069	-1.56887	479.9	16.2667	1.77333	49.9133	3.56	0.89	4	3	Phyllanthus emblica Linn.
20	2012	1054	101.85	26.7164	799.457	22.1607	-1.495	386.933	9.73333	3.4	21.0767	1.66667	1.50667	4	1	Agave sisalana Perr. ex Engelm.
21	2011	1240	104.99	32.5363	875.425	12.7899	-0.0560354	469.48	18.1867	0.820667	6.04533	0.645333	0.184	3	3	Quercus variabilis Blume
22	2012	1330	102.002	27.7245	813.16	16.5776	0.0257995	482.533	24.4	2.73667	23.5867	2.15333	0.63	4	1	Dodonaea viscosa Jacq.
23	2012	1352	102.227	29.9317	688.142	11.0858	-1.2964	444.033	33.0333	1.65667	89.18	7.69333	1.14667	4	3	Albizia julibrissin Durazz.
24	2012	1367	101.945	27.7189	846.085	21.5053	0.0257995	427.467	36.4	2.37	35.95	2.06	0.646667	4	3	Albizia julibrissin Durazz.
25	2011	1467	108.133	32.1821	1696.26	10.551	-0.127171	462.733	39.3833	2.17667	6.06	0.576667	0.136667	4	3	Elaeagnus umbellata Thunb.
26	2012	1484	103.287	28.7673	979.705	9.91627	-1.28246	473.067	25.1	2.01667	92.21	8.51	1.67	3	1	Cotoneaster microphyllus Lindl.
27	2012	1603	103.442	31.2866	963.047	11.4017	-0.55733	447.233	21.0667	1.10667	20.82	1.71	0.51	4	3	Cotinus coggygria Scop.
28	2012	1621	103.79	31.6299	901.675	4.42897	-1.5632	444.3	25.85	1.475	17.715	1.455	0.545	4	3	Bauhinia brachycarpa Wall. ex Benth. var. microphylla
29	2012	1710	103.843	31.7735	852.107	7.09117	-1.63523	463.05	16.85	1.25	13.165	0.675	1.005	3	3	Rosa omeiensis Rolfe
30	2012	1790	103	31	1066.58	2.35319	-0.592247	454	15	0.9	26.89	2.78	0.69	4	3	Spiraea chinensis Maxim.
31	2012	1826	101.939	30.8158	688.142	11.0858	0.231504	444.14	22.04	1.174	17.936	1.516	1.002	4	3	Bauhinia brachycarpa Wall. ex Benth. var. microphylla
32	2012	1840	103.857	31.8	775.345	2.5946	-1.63523	484.5	19.7	1.24	16.85	1.37	0.63	4	3	Cotinus coggygria Scop.
33	2012	1852	103.184	31.4705	957.902	8.53445	-0.794021	441.05	18.2	1.105	48.405	2.885	0.965	3	3	Cotoneaster acutifolius Turcz.
34	2012	1886	102.439	31.2891	720.677	6.74022	0.154788	432.1	19.85	1.165	26.12	2.06	0.385	3	3	Coriaria sinica Maxim.
35	2012	1928	101.262	27.8578	813.16	16.5776	-0.734761	470.783	23.4667	2.31333	86.62	4.56667	1.12667	4	3	Lespedeza bicolor Turcz.
36	2011	2000	102.236	28.5759	744.647	7.81135	-0.856105	468.2	10.5	1.02	86.74	5.24	1.42	2	1	Quercus monimotricha Hand.-Mazz
37	2012	2011	103.846	31.828	373.51	11.0909	-1.44755	486.7	20.8	1.25	40.33	4.19	0.73	4	3	Cotinus coggygria Scop.
38	2012	2020	101.871	31.0683	831.677	0.11281	0.69184	445.45	18.05	1.705	46.37	4.155	1.77	3	3	Cotoneaster acutifolius Turcz.
39	2011	2050	102.237	28.5913	744.647	7.81135	-0.856105	475.733	12.9667	1.11	45.5167	3.07333	0.69	2	1	Quercus monimotricha Hand.-Mazz
40	2012	2063	103.154	28.3544	1001.93	10.356	-1.42266	407.3	15.5	0.903333	46.23	1.49667	0.603333	3	3	Coriaria sinica Maxim.
41	2011	2100	102.241	28.5976	744.647	7.81135	-0.856105	466.55	16.2	0.895	28.97	2.56	0.56	3	3	Corylus yunnanensis A. Camus
42	2011	2145	102.886	28.056	723.752	10.7276	-1.03998	478.3	13.2	1.04	22.96	2.23	0.46	2	2	Pinus densata var. pygmaea Hsüeh
43	2012	2193	103.188	28.3795	979.705	9.91627	-1.42266	410.667	21.0667	1.99	66.95	5.09	1.31667	3	3	Corylus yunnanensis A. Camus
44	2011	2200	102.671	28.4412	795.542	11.1645	-0.939269	497	14.5	0.825	76.435	4.67	0.63	2	1	Rhododendron racemosum Franch.
45	2012	2236	102.005	31.7264	918.692	4.59826	1.37936	442.133	26.4	1.74333	27.96	2.57667	0.71	4	3	Bauhinia brachycarpa Wall. ex Benth. var. microphylla
46	2011	2350	99.1148	28.6386	407.462	13.8793	-0.270803	441.275	25.825	1.4375	28.76	0.72	1.05	4	3	Sophora viciifolia Hance
47	2011	2605	102.843	27.6636	724.052	8.59661	-0.869023	476	14.2	1.26	49.29	4	0.66	2	2	Pinus densata var. pygmaea Hsüeh
48	2012	2612	101.315	27.5895	1088.5	16.2627	-0.823567	480.167	13.7667	1.16333	45.3667	3.44	1.04	3	1	Cotoneaster pannosus Franch.
49	2012	2790	101.222	27.7441	793.547	6.45611	-0.799039	485.2	12.5	1.11	37.26	2.64667	0.816667	2	1	Quercus longispica A. Camus
50	2011	2850	100.114	29.3367	490.015	1.34631	-1.04978	443.333	17.4333	1.55	18.44	1.76	0.7	3	3	Cotoneaster acutifolius Turcz.
51	2012	2869	103.227	28.3978	965.312	4.69865	-1.43368	459.1	14.9333	1.3	36.1367	2.75333	0.743333	2	1	Quercus monimotricha Hand.-Mazz
52	2012	2947	101.69	27.5115	951.257	10.5864	-0.399726	482.167	13.1667	1.17833	40.3133	2.82333	0.87	2	1	Rhododendron decorum Franch.
53	2012	2952	103.236	28.4077	1008.55	0.27009	-1.53322	455.1	21.0333	2.09333	42.3467	4.05667	1.55333	2	1	Quercus monimotricha Hand.-Mazz
54	2011	2953	99.1445	28.9609	490.015	1.34631	-0.438656	450.3	17.9333	1.44667	19.99	2.16	0.8	3	3	Rosa sericea Lindl.
55	2012	2956	103.256	28.3995	965.312	4.69865	-1.43368	457.433	15	1.64	106.243	8.10667	1.96333	2	1	Rhododendron racemosum Franch.
56	2011	2958	103.42	28.4772	717.017	11.9789	-1.56	485.4	13.05	0.855	76.62	5.545	0.785	2	1	Rhododendron racemosum Franch.
57	2011	3060	102.486	27.8538	624.437	9.28976	-1.32655	477.8	21.8	2.06	42.79	2.9	0.79	2	2	Pinus densata var. pygmaea Hsüeh
58	2011	3075	102.487	27.8558	624.437	9.28976	-1.32655	484.4	12.65	0.98	17.215	1.155	0.27	2	1	Rhododendron racemosum Franch.
59	2012	3091	100.834	31.2278	782.455	3.28672	1.48092	467.033	29.8333	2.44	20.4233	1.41333	0.78	1	3	Salix variegata Franch.
60	2011	3127	102.549	27.8783	646.54	6.63243	-1.32864	484.467	13.1	0.88	35.95	1.76	0.263333	2	1	Rhododendron racemosum Franch.
61	2012	3156	101.721	27.5349	783.625	13.9722	-0.311033	430.367	22.6333	1.44	37.91	1.81	0.69	3	3	Coriaria sinica Maxim.
62	2012	3175	101.227	27.6753	778.172	11.8037	-0.947522	494.633	13.7	1.47833	72.5	3.70333	2.01	2	1	Rhododendron decorum Franch.
63	2011	3325	102.531	27.8927	646.54	6.63243	-1.32864	465.5	17.3	1.33	52.12	3.89	0.73	2	1	Quercus monimotricha Hand.-Mazz
64	2012	3332	101.229	30.8887	782.755	3.59977	0.724516	467	16.5	3.36	75.4	6.88	2.05333	1	3	Sibiraea angustata Hand.-Mazz.
65	2012	3342	100.098	31.4831	1139.58	10.0767	1.75099	441.267	21.9333	2.04333	52.9333	4.59	0.87	3	3	Rosa sericea Lindl.
66	2012	3344	102.952	33.0115	775.637	4.47274	1.43464	473	20.7	1.49	167.08	10.16	0.94	1	3	Sibiraea angustata Hand.-Mazz.
67	2012	3432	103.732	33.059	775.637	4.47274	0.516801	467.1	24.7	1.22	43.55	4.1	1.24	1	3	Spiraea myrtilloides Rehd.
68	2012	3506	101.618	30.5309	749.11	0.16378	-0.0812464	476.833	13.7333	1.35	34.4967	2.59667	0.566667	2	1	Quercus aquifolioides Rehd. et Wils.
69	2012	3520	102.496	32.7825	866.44	1.30838	1.95548	448.1	20.5	2.69	57.46	5.22	1.47	1	3	Potentilla fruticosa Linn.
70	2012	3535	100.74	31.8503	860.785	2.2131	1.5894	459.7	22.1	1.605	71.135	7.585	1.11	1	3	Sibiraea angustata Hand.-Mazz.
71	2012	3556	102.344	32.519	866.44	1.30838	2.01691	489	34.5	2.7	35.33	3.35	0.85	1	3	Lonicera rupicola Hook. f. et Thoms.
72	2012	3560	102.656	32.1905	993.76	0.65643	1.18644	465.3	28.2	2.61	76.65	6.88	1.19	1	3	Salix cupularis Rehd.
73	2012	3593	102.488	32.2253	1013.44	1.08445	1.66173	478.4	26.7333	2.04667	41.1567	3.86333	1.46333	1	3	Spiraea myrtilloides Rehd.
74	2012	3624	103.667	32.8297	407.462	13.8793	0.718188	484.2	23.8	2.35	49.2	4.355	1.175	1	1	Rhododendron telmateium Balf. f. et W. W. Smith
75	2012	3628	102.952	33.0115	775.345	2.5946	1.43464	447.6	19.8	1.84	55.38	5.32	1.29	1	3	Potentilla fruticosa Linn.
76	2012	3630	103.667	32.7342	407.462	13.8793	0.737822	466.5	26	2.27	61.87	5.46	1.14	1	3	Spiraea myrtilloides Rehd.
77	2012	3673	101.857	30.0238	756.872	-2.49105	-1.71133	494	15.2667	1.09333	74.3633	5.93667	1.07667	2	1	Quercus pannosa Hand.-Mazz.
78	2012	3675	102.868	30.9731	961.217	-4.67493	-0.309265	469.45	26.85	2.26	94.62	7.74	1.21	2	1	Quercus aquifolioides Rehd. et Wils.
79	2011	3680	100.398	29.7331	638.74	4.19396	-0.865904	488.85	14.85	1.58	82.41	5.88	1.43	1	1	Rhododendron telmateium Balf. f. et W. W. Smith
80	2012	3697	100.709	31.7088	840.392	-0.67271	1.68576	465.3	28.4	2.73	47.3433	3.62	0.883333	1	3	Salix sphaeronymphe Gorz
81	2012	3709	102.656	31.9064	1013.44	1.08445	0.64476	467.05	21	2.075	83.835	7.495	1.55	1	3	Sibiraea angustata Hand.-Mazz.
82	2012	3748	101.691	31.5376	918.692	4.59826	1.54722	461.2	24.6	2.01	32.4	2.37	0.74	1	3	Sibiraea angustata Hand.-Mazz.
83	2012	3785	99.9763	31.5437	802.09	-1.30799	1.2806	463.1	28.9	1.78667	74.9567	7.43667	1.07333	1	3	Salix oreinoma Schneid.
84	2012	3800	101.69	31.5275	918.692	4.59826	1.54722	539.8	17.5	1.32	19.04	1.43	0.66	1	1	Rhododendron thymifolium Maxim.
85	2012	3813	102.132	32.7141	648.722	-0.38994	1.98419	457.1	25.1	2.3	46.33	4.38	1.35	1	3	Sibiraea angustata Hand.-Mazz.
86	2012	3847	100.233	31.6246	887.237	4.44536	1.52421	457.933	21.5667	1.9	46.0167	4.52667	0.856667	1	3	Sibiraea angustata Hand.-Mazz.
87	2011	3858	101.741	30.0597	864.13	-0.59454	0.657663	489.65	17.45	1.27	101.49	7.445	1.225	1	1	Rhododendron capitatum Maxim.
88	2012	3909	101.065	32.3069	841.367	-1.09632	1.43392	469.55	13.4	1.26	64.815	6.36	1.385	1	3	Sibiraea angustata Hand.-Mazz.
89	2012	3915	101.579	30.5423	756.677	2.67485	0.0921555	523.867	16.2333	1.39	91.9333	7.83667	1.49333	1	1	Rhododendron thymifolium Maxim.
90	2012	3947	101.58	30.5408	756.677	2.67485	0.0921555	521.233	15.1667	1.21	56.4	4.71667	0.966667	1	1	Rhododendron telmateium Balf. f. et W. W. Smith
91	2012	3965	102.606	31.2322	993.76	0.65643	-0.0280499	488.4	23.8	2.37	26.68	2.93	1.22	1	1	Rhododendron telmateium Balf. f. et W. W. Smith
92	2011	3973	99.0889	28.9533	403.952	6.66084	-0.205653	492.55	16.2	1.255	29.695	2.07	0.605	1	1	Rhododendron telmateium Balf. f. et W. W. Smith
93	2012	3973	101.578	30.5458	756.677	2.67485	0.0921555	506.333	13.6	1.49333	52.8533	5.02667	1.44333	1	1	Rhododendron telmateium Balf. f. et W. W. Smith
94	2011	3980	100.333	29.8805	651.19	3.40654	-0.950001	454.9	22.7	2.25	86.43	7.76	1.14	1	3	Sibiraea angustata Hand.-Mazz.
95	2012	3980	102.607	32.2323	966.482	-4.25354	0.531935	461.6	29.5	3.43	40.67	4.12	1.32	1	3	Sibiraea angustata Hand.-Mazz.
96	2012	4015	102.585	32.2264	820.697	1.86705	1.53719	483.1	20.7	1.86	53.45	5.09	1.31	1	1	Rhododendron telmateium Balf. f. et W. W. Smith
97	2012	4027	102.886	30.9268	966.482	-4.25354	-0.309265	503.7	23.4	2.1	101.17	8.13	0.72	1	1	Rhododendron telmateium Balf. f. et W. W. Smith
98	2012	4034	102.322	31.7047	940.277	1.71152	1.10743	462.2	32.85	3.31	33.53	3.23	1.17	1	3	Sibiraea angustata Hand.-Mazz.
99	2011	4064	100.352	30.0839	636.07	2.3604	-1.24279	457.6	20.5	1.69	68.96	6.56	1.01	1	3	Sibiraea angustata Hand.-Mazz
100	2011	4078	100.286	28.9318	459.775	1.46373	-1.18435	487.5	12.2	0.97	33.28	3.1	1.04	2	1	Quercus pannosa Hand.-Mazz
101	2011	4087	100.064	30.1253	541.307	2.20502	-1.34041	501	19.7	1.36	85.115	6.59	1.14	1	1	Rhododendron telmateium Balf. f. et W. W. Smith
102	2011	4095	100.357	30.0771	636.07	2.3604	-0.481763	489.4	14.9	1.26	48.84	4.48	0.97	1	1	Rhododendron telmateium Balf. f. et W. W. Smith
103	2012	4105	102.313	31.7069	1013.44	1.08445	1.25833	502.1	12.8	1.29	31.29	2.56	1.01	1	1	Rhododendron agglutinatum Balf. f. et Forrest
104	2012	4108	102.313	31.7067	903.88	3.12149	1.25833	371.4	12.2	1.3	34.24	2.82	0.95	1	1	Rhododendron capitatum Maxim.
105	2012	4115	99.9105	31.3879	761.792	0.11611	1.54126	510.9	25.4333	1.58333	92.9267	6.88	1.05667	1	1	Rhododendron thymifolium Maxim.
106	2012	4122	99.0335	31.8872	855.722	-2.43068	1.75621	518.067	20.3333	1.38	32.4167	2.35	0.576667	1	1	Rhododendron thymifolium Maxim.
107	2012	4127	102.591	32.2315	688.742	-0.46355	1.53719	490	12.8	1.43	42.96	4.47	1.48	1	1	Rhododendron floccigerum Franch.
108	2011	4146	101.72	31.508	918.692	4.59826	-0.835891	502.2	19.5	1.76	31.84	2.2	0.62	1	1	Rhododendron telmateium Balf. f. et W. W. Smith
109	2012	4154	99.9099	31.3908	761.792	0.11611	1.54126	515.767	11.1333	1.23	72.7433	6.8	1.18667	1	2	Sabina pingii var. wilsonii Cheng et L. K. Fu
110	2012	4167	102.756	31.8542	940.277	1.71152	0.452902	496.6	20.55	1.88	24.48	2.1	1.03	1	1	Rhododendron capitatum Maxim.
111	2011	4196	100.293	28.9237	459.775	1.46373	-1.18435	492.7	18.6	1.53	52.23	4.99	1.07	1	1	Rhododendron yungningense Balf. f. ex Hutch.
112	2012	4198	99.9719	31.4559	784.592	-1.39533	1.40356	526.2	19.5	1.62	161.813	11.95	1.10333	1	1	Rhododendron thymifolium Maxim.
113	2012	4208	102.587	32.2323	820.697	1.86705	1.53719	358.2	14.5	1.92	31.27	3.13	1.25	1	3	Potentilla glabra Lodd.
114	2012	4212	99.9723	31.4554	784.592	-1.39533	1.40356	466.3	28.7333	1.78	132.193	11.0167	1.37	1	3	Sibiraea angustata Hand.-Mazz.
115	2011	4214	101.795	30.0775	864.13	-0.59454	0.657663	525.883	16.35	1.31667	64.1733	4.92667	1.01333	1	1	Rhododendron telmateium Balf. f. et W. W. Smith
116	2011	4237	100.868	30.0046	722.132	0.80078	-0.859282	481.767	11.9667	1.35	53.93	4.47667	0.936667	1	2	Sabina pingii var. wilsonii Cheng et L. K. Fu
117	2011	4265	100.263	28.8422	471.812	0.58418	-1.18275	496.9	17.3	1.53	52.72	4.66	1.11	1	1	Rhododendron telmateium Balf. f. et W. W. Smith
118	2011	4378	100.255	28.8756	471.812	0.58418	-1.18275	501.6	12.2	1.31	110.32	8.32	1.64	1	2	Sabina pingii var. wilsonii Cheng et L. K. Fu
119	2011	4398	99.0373	30.284	366.257	1.67392	-1.35947	489.95	28.25	1.85	87.675	6.415	0.71	1	1	Rhododendron telmateium Balf. f. et W. W. Smith
120	2011	4425	100.279	28.9016	459.775	1.46373	-1.18275	499.9	10.65	1.25	45.72	3.34	0.73	1	1	Rhododendron phaeochrysum Balf. f. et W. W. Smith
121	2011	4477	100.859	30.0113	722.132	0.80078	-0.859282	515.1	27.4	2.18	64.36	5.5	1.08	1	1	Rhododendron telmateium Balf. f. et W. W. Smith
122	2012	4543	99.9675	31.4164	784.592	-1.39533	1.40356	495.9	17.5	1.59	85.0667	7.22667	1.60333	1	1	Rhododendron telmateium Balf. f. et W. W. Smith
123	2012	4561	99.8446	31.2213	696.7	-1.18631	0.932356	511.367	19.4333	1.6	68.7033	6.09	1.32	1	1	Rhododendron telmateium Balf. f. et W. W. Smith
124	2012	4636	99.951	31.4066	784.592	-1.39533	1.40356	517.067	20.8	1.78333	83.0067	7.30667	1.42333	1	1	Rhododendron telmateium Balf. f. et W. W. Smith
125	2011	4685	100.19	29.4493	518.05	0.80001	-1.07802	497.7	16.3	1.25	71.26	5.57	0.84	1	1	Rhododendron telmateium Balf. f. et W. W. Smith

## Sheet: Mean value of leaf element
	Leaf C	Leaf N	Leaf P	Leaf C:N	Leaf C:P	Leaf N:P
	462.867	16.6667	0.823333	27.772	562.186	20.2429
	479.833	21.2	2.64	22.6336	181.755	8.0303
	433.567	17.3	0.846667	25.0617	512.087	20.4331
	454.25	13.625	1.295	33.3394	350.772	10.5212
	444.5	13.675	0.6875	32.5046	646.545	19.8909
	435.867	15.1667	1.58	28.7385	275.865	9.59916
	455.025	11.95	1.3775	38.0774	330.327	8.67514
	463.2	16.2	1.22	28.5926	379.672	13.2787
	459.8	13.3	0.88	34.5714	522.5	15.1136
	422.5	15.7	1.14	26.9108	370.614	13.7719
	457.2	25.9	2.52	17.6525	181.429	10.2778
	452.167	21.3	1.16333	21.2285	388.682	18.3095
	440.55	15.475	1.0775	28.4685	408.863	14.3619
	459.8	20.2333	0.973333	22.7249	472.397	20.7877
	430.925	13.35	0.7275	32.279	592.337	18.3505
	467.6	19.4	1.29	24.1031	362.481	15.0388
	432.6	20.3667	1.14	21.2406	379.474	17.8655
	465.95	18	0.9975	25.8861	467.118	18.0451
	479.9	16.2667	1.77333	29.502	270.62	9.17293
	386.933	9.73333	3.4	39.7534	113.804	2.86275
	469.48	18.1867	0.820667	25.8145	572.071	22.1608
	482.533	24.4	2.73667	19.776	176.322	8.91596
	444.033	33.0333	1.65667	13.442	268.028	19.9396
	427.467	36.4	2.37	11.7436	180.366	15.3586
	462.733	39.3833	2.17667	11.7495	212.588	18.0934
	473.067	25.1	2.01667	18.8473	234.579	12.4463
	447.233	21.0667	1.10667	21.2294	404.127	19.0361
	444.3	25.85	1.475	17.1876	301.22	17.5254
	463.05	16.85	1.25	27.4807	370.44	13.48
	454	15	0.9	30.2667	504.444	16.6667
	444.14	22.04	1.174	20.1515	378.313	18.7734
	484.5	19.7	1.24	24.5939	390.726	15.8871
	441.05	18.2	1.105	24.2335	399.14	16.4706
	432.1	19.85	1.165	21.7683	370.901	17.0386
	470.783	23.4667	2.31333	20.0618	203.509	10.1441
	468.2	10.5	1.02	44.5905	459.02	10.2941
	486.7	20.8	1.25	23.399	389.36	16.64
	445.45	18.05	1.705	24.6787	261.261	10.5865
	475.733	12.9667	1.11	36.6889	428.589	11.6817
	407.3	15.5	0.903333	26.2774	450.886	17.1587
	466.55	16.2	0.895	28.7994	521.285	18.1006
	478.3	13.2	1.04	36.2348	459.904	12.6923
	410.667	21.0667	1.99	19.4937	206.365	10.5863
	497	14.5	0.825	34.2759	602.424	17.5758
	442.133	26.4	1.74333	16.7475	253.614	15.1434
	441.275	25.825	1.4375	17.0871	306.974	17.9652
	476	14.2	1.26	33.5211	377.778	11.2698
	480.167	13.7667	1.16333	34.8789	412.751	11.8338
	485.2	12.5	1.11	38.816	437.117	11.2613
	443.333	17.4333	1.55	25.4302	286.022	11.2473
	459.1	14.9333	1.3	30.7433	353.154	11.4872
	482.167	13.1667	1.17833	36.6203	409.194	11.174
	455.1	21.0333	2.09333	21.6371	217.404	10.0478
	450.3	17.9333	1.44667	25.1097	311.267	12.3963
	457.433	15	1.64	30.4956	278.923	9.14634
	485.4	13.05	0.855	37.1954	567.719	15.2632
	477.8	21.8	2.06	21.9174	231.942	10.5825
	484.4	12.65	0.98	38.2925	494.286	12.9082
	467.033	29.8333	2.44	15.6547	191.407	12.2268
	484.467	13.1	0.88	36.9822	550.53	14.8864
	430.367	22.6333	1.44	19.0147	298.866	15.7176
	494.633	13.7	1.47833	36.1046	334.589	9.26719
	465.5	17.3	1.33	26.9075	350	13.0075
	467	16.5	3.36	28.303	138.988	4.91071
	441.267	21.9333	2.04333	20.1185	215.954	10.7341
	473	20.7	1.49	22.8502	317.45	13.8926
	467.1	24.7	1.22	18.9109	382.869	20.2459
	476.833	13.7333	1.35	34.7209	353.21	10.1728
	448.1	20.5	2.69	21.8585	166.58	7.62082
	459.7	22.1	1.605	20.8009	286.417	13.7695
	489	34.5	2.7	14.1739	181.111	12.7778
	465.3	28.2	2.61	16.5	178.276	10.8046
	478.4	26.7333	2.04667	17.8953	233.746	13.0619
	484.2	23.8	2.35	20.3445	206.043	10.1277
	447.6	19.8	1.84	22.6061	243.261	10.7609
	466.5	26	2.27	17.9423	205.507	11.4537
	494	15.2667	1.09333	32.3581	451.829	13.9634
	469.45	26.85	2.26	17.4842	207.721	11.8805
	488.85	14.85	1.58	32.9192	309.399	9.39873
	465.3	28.4	2.73	16.3838	170.44	10.4029
	467.05	21	2.075	22.2405	225.084	10.1205
	461.2	24.6	2.01	18.748	229.453	12.2388
	463.1	28.9	1.78667	16.0242	259.198	16.1754
	539.8	17.5	1.32	30.8457	408.939	13.2576
	457.1	25.1	2.3	18.2112	198.739	10.913
	457.933	21.5667	1.9	21.2334	241.018	11.3509
	489.65	17.45	1.27	28.0602	385.551	13.7402
	469.55	13.4	1.26	35.041	372.659	10.6349
	523.867	16.2333	1.39	32.271	376.882	11.6787
	521.233	15.1667	1.21	34.367	430.771	12.5344
	488.4	23.8	2.37	20.521	206.076	10.0422
	492.55	16.2	1.255	30.4043	392.47	12.9084
	506.333	13.6	1.49333	37.2304	339.062	9.10714
	454.9	22.7	2.25	20.0396	202.178	10.0889
	461.6	29.5	3.43	15.6475	134.577	8.60058
	483.1	20.7	1.86	23.3382	259.731	11.129
	503.7	23.4	2.1	21.5256	239.857	11.1429
	462.2	32.85	3.31	14.07	139.637	9.92447
	457.6	20.5	1.69	22.322	270.769	12.1302
	487.5	12.2	0.97	39.959	502.577	12.5773
	501	19.7	1.36	25.4315	368.382	14.4853
	489.4	14.9	1.26	32.8456	388.413	11.8254
	502.1	12.8	1.29	39.2266	389.225	9.92248
	371.4	12.2	1.3	30.4426	285.692	9.38462
	510.9	25.4333	1.58333	20.0878	322.674	16.0632
	518.067	20.3333	1.38	25.4787	375.411	14.7343
	490	12.8	1.43	38.2812	342.657	8.95105
	502.2	19.5	1.76	25.7538	285.341	11.0795
	515.767	11.1333	1.23	46.3263	419.322	9.05149
	496.6	20.55	1.88	24.1655	264.149	10.9309
	492.7	18.6	1.53	26.4892	322.026	12.1569
	526.2	19.5	1.62	26.9846	324.815	12.037
	358.2	14.5	1.92	24.7034	186.562	7.55208
	466.3	28.7333	1.78	16.2285	261.966	16.1423
	525.883	16.35	1.31667	32.1641	399.405	12.4177
	481.767	11.9667	1.35	40.2591	356.864	8.8642
	496.9	17.3	1.53	28.7225	324.771	11.3072
	501.6	12.2	1.31	41.1148	382.901	9.31298
	489.95	28.25	1.85	17.3434	264.838	15.2703
	499.9	10.65	1.25	46.939	399.92	8.52
	515.1	27.4	2.18	18.7993	236.284	12.5688
	495.9	17.5	1.59	28.3371	311.887	11.0063
	511.367	19.4333	1.6	26.3139	319.604	12.1458
	517.067	20.8	1.78333	24.859	289.944	11.6636
	497.7	16.3	1.25	30.5337	398.16	13.04
Arithmetic mean	469.817	19.3771	1.60004	26.4247	331.713	12.8434
Standard deviation	29.7879	5.89294	0.592694	7.84254	113.502	3.52608
Coefficient of variation (%)	6.34031	30.4118	37.0425	29.6789	34.2168	27.4545
Geometric mean	468.9	18.6	1.5	25.3	312	12.34

## Sheet: Mean value of soil element
	Soil C	Soil N	Soil P	Soil C:N	Soil C:P	Soil N:P
	52.11	3.06333	0.52	17.0109	100.212	5.89103
	9.85	1.18333	0.496667	8.32394	19.8322	2.38255
	43.6267	2.17333	0.803333	20.0736	54.3071	2.70539
	10.855	1.125	0.415	9.64889	26.1566	2.71084
	60.79	2.35	0.6125	25.8681	99.249	3.83673
	4.20333	0.943333	0.476667	4.45583	8.81818	1.97902
	8.94	0.9975	0.2925	8.96241	30.5641	3.41026
	29.99	1.35	0.62	22.2148	48.371	2.17742
	25.12	2.61	1.11	9.62452	22.6306	2.35135
	11.76	1.13	0.86	10.4071	13.6744	1.31395
	13	1.28	0.4	10.1562	32.5	3.2
	13.6067	1.365	0.275	9.96825	49.4788	4.96364
	14.5525	1.4275	0.225	10.1944	64.6778	6.34444
	4.82	0.876667	0.773333	5.4981	6.23276	1.13362
	22.85	1.475	0.24	15.4915	95.2083	6.14583
	57.77	6.13	0.74	9.42414	78.0676	8.28378
	3.53	0.76	0.883333	4.64474	3.99623	0.860377
	53.6	3.37	0.39	15.905	137.436	8.64103
	49.9133	3.56	0.89	14.0206	56.0824	4
	21.0767	1.66667	1.50667	12.646	13.9889	1.10619
	6.04533	0.645333	0.184	9.36777	32.8551	3.50725
	23.5867	2.15333	0.63	10.9536	37.4392	3.41799
	89.18	7.69333	1.14667	11.5919	77.7733	6.7093
	35.95	2.06	0.646667	17.4515	55.5928	3.18557
	6.06	0.576667	0.136667	10.5087	44.3415	4.21951
	92.21	8.51	1.67	10.8355	55.2156	5.09581
	20.82	1.71	0.51	12.1754	40.8235	3.35294
	17.715	1.455	0.545	12.1753	32.5046	2.66972
	13.165	0.675	1.005	19.5037	13.0995	0.671642
	26.89	2.78	0.69	9.67266	38.971	4.02899
	17.936	1.516	1.002	11.8311	17.9002	1.51297
	16.85	1.37	0.63	12.2993	26.746	2.1746
	48.405	2.885	0.965	16.7782	50.1606	2.98964
	26.12	2.06	0.385	12.6796	67.8442	5.35065
	86.62	4.56667	1.12667	18.9679	76.8817	4.05325
	86.74	5.24	1.42	16.5534	61.0845	3.69014
	40.33	4.19	0.73	9.6253	55.2466	5.73973
	46.37	4.155	1.77	11.16	26.1977	2.34746
	45.5167	3.07333	0.69	14.8102	65.9662	4.45411
	46.23	1.49667	0.603333	30.8886	76.6243	2.48066
	28.97	2.56	0.56	11.3164	51.7321	4.57143
	22.96	2.23	0.46	10.296	49.913	4.84783
	66.95	5.09	1.31667	13.1532	50.8481	3.86582
	76.435	4.67	0.63	16.3672	121.325	7.4127
	27.96	2.57667	0.71	10.8512	39.3803	3.62911
	28.76	0.72	1.05	39.9444	27.3905	0.685714
	49.29	4	0.66	12.3225	74.6818	6.06061
	45.3667	3.44	1.04	13.188	43.6218	3.30769
	37.26	2.64667	0.816667	14.0781	45.6245	3.24082
	18.44	1.76	0.7	10.4773	26.3429	2.51429
	36.1367	2.75333	0.743333	13.1247	48.6143	3.70404
	40.3133	2.82333	0.87	14.2786	46.3372	3.24521
	42.3467	4.05667	1.55333	10.4388	27.2618	2.61159
	19.99	2.16	0.8	9.25463	24.9875	2.7
	106.243	8.10667	1.96333	13.1057	54.1138	4.12903
	76.62	5.545	0.785	13.8179	97.6051	7.06369
	42.79	2.9	0.79	14.7552	54.1646	3.67089
	17.215	1.155	0.27	14.9048	63.7593	4.27778
	20.4233	1.41333	0.78	14.4505	26.1838	1.81197
	35.95	1.76	0.263333	20.4261	136.519	6.68354
	37.91	1.81	0.69	20.9448	54.942	2.62319
	72.5	3.70333	2.01	19.577	36.0697	1.84245
	52.12	3.89	0.73	13.3985	71.3973	5.32877
	75.4	6.88	2.05333	10.9593	36.7208	3.35065
	52.9333	4.59	0.87	11.5323	60.8429	5.27586
	167.08	10.16	0.94	16.4449	177.745	10.8085
	43.55	4.1	1.24	10.622	35.121	3.30645
	34.4967	2.59667	0.566667	13.285	60.8765	4.58235
	57.46	5.22	1.47	11.0077	39.0884	3.55102
	71.135	7.585	1.11	9.37838	64.0856	6.83333
	35.33	3.35	0.85	10.5463	41.5647	3.94118
	76.65	6.88	1.19	11.141	64.4118	5.78151
	41.1567	3.86333	1.46333	10.6531	28.1253	2.64009
	49.2	4.355	1.175	11.2974	41.8723	3.70638
	55.38	5.32	1.29	10.4098	42.9302	4.12403
	61.87	5.46	1.14	11.3315	54.2719	4.78947
	74.3633	5.93667	1.07667	12.5261	69.0681	5.51393
	94.62	7.74	1.21	12.2248	78.1983	6.39669
	82.41	5.88	1.43	14.0153	57.6294	4.11189
	47.3433	3.62	0.883333	13.0783	53.5962	4.09811
	83.835	7.495	1.55	11.1855	54.0871	4.83548
	32.4	2.37	0.74	13.6709	43.7838	3.2027
	74.9567	7.43667	1.07333	10.0793	69.8354	6.92857
	19.04	1.43	0.66	13.3147	28.8485	2.16667
	46.33	4.38	1.35	10.5776	34.3185	3.24444
	46.0167	4.52667	0.856667	10.1657	53.716	5.28405
	101.49	7.445	1.225	13.632	82.849	6.07755
	64.815	6.36	1.385	10.191	46.7978	4.59206
	91.9333	7.83667	1.49333	11.7312	61.5625	5.24777
	56.4	4.71667	0.966667	11.9576	58.3448	4.87931
	26.68	2.93	1.22	9.1058	21.8689	2.40164
	29.695	2.07	0.605	14.3454	49.0826	3.42149
	52.8533	5.02667	1.44333	10.5146	36.6189	3.48268
	86.43	7.76	1.14	11.1379	75.8158	6.80702
	40.67	4.12	1.32	9.87136	30.8106	3.12121
	53.45	5.09	1.31	10.501	40.8015	3.8855
	101.17	8.13	0.72	12.444	140.514	11.2917
	33.53	3.23	1.17	10.3808	28.6581	2.76068
	68.96	6.56	1.01	10.5122	68.2772	6.49505
	33.28	3.1	1.04	10.7355	32	2.98077
	85.115	6.59	1.14	12.9158	74.6623	5.7807
	48.84	4.48	0.97	10.9018	50.3505	4.61856
	31.29	2.56	1.01	12.2227	30.9802	2.53465
	34.24	2.82	0.95	12.1418	36.0421	2.96842
	92.9267	6.88	1.05667	13.5068	87.9432	6.51104
	32.4167	2.35	0.576667	13.7943	56.2139	4.07514
	42.96	4.47	1.48	9.61074	29.027	3.02027
	31.84	2.2	0.62	14.4727	51.3548	3.54839
	72.7433	6.8	1.18667	10.6975	61.3006	5.73034
	24.48	2.1	1.03	11.6571	23.767	2.03883
	52.23	4.99	1.07	10.4669	48.8131	4.66355
	161.813	11.95	1.10333	13.5409	146.659	10.8308
	31.27	3.13	1.25	9.99042	25.016	2.504
	132.193	11.0167	1.37	11.9994	96.4915	8.04136
	64.1733	4.92667	1.01333	13.0257	63.3289	4.86184
	53.93	4.47667	0.936667	12.0469	57.5765	4.77936
	52.72	4.66	1.11	11.3133	47.4955	4.1982
	110.32	8.32	1.64	13.2596	67.2683	5.07317
	87.675	6.415	0.71	13.6672	123.486	9.03521
	45.72	3.34	0.73	13.6886	62.6301	4.57534
	64.36	5.5	1.08	11.7018	59.5926	5.09259
	85.0667	7.22667	1.60333	11.7712	53.0561	4.50728
	68.7033	6.09	1.32	11.2813	52.048	4.61364
	83.0067	7.30667	1.42333	11.3604	58.3185	5.13349
	71.26	5.57	0.84	12.7935	84.8333	6.63095
Arithmetic mean	49.8661	4.00909	0.949315	12.7934	54.4045	4.28962
Standard deviation	30.6379	2.42259	0.399273	4.32451	29.5236	2.00134
Coefficient of variation (%)	61.4404	60.4274	42.0591	33.8026	54.2668	46.6553
Geometric mean	39.9352	3.25955	0.852671	12.2517	46.8354	3.82276
